# Supplementary material
Source: Springer Nature journal article supplement (https://www.springermedizin.de/resource/supplementary/12967_2005_97_MOESM4_ESM.pdf/9575686)

**Control****Plasma****IL-1****IL-1/Plasma****VE-cadherin**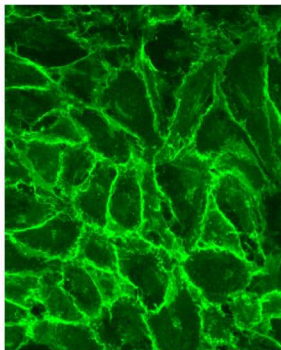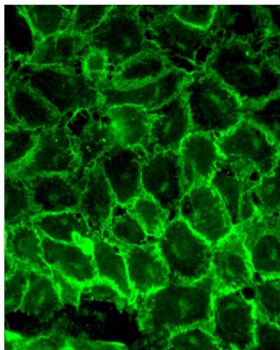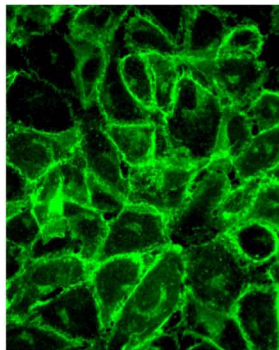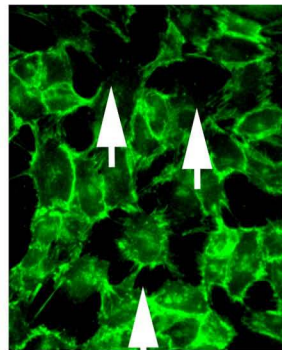**F-actin**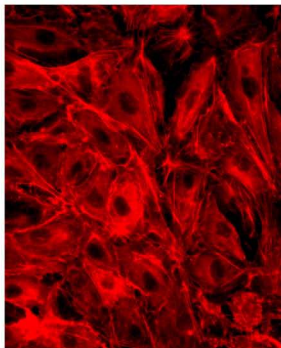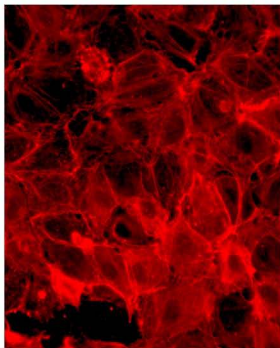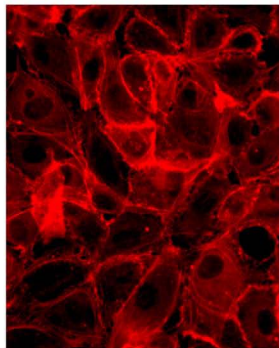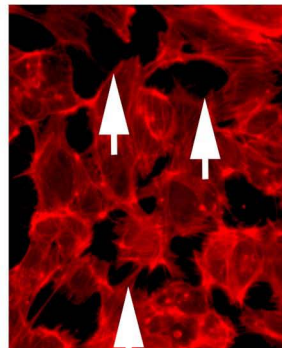

Supplement: MOESM4 [file 9575686]
